# Supplementary material for: Simultaneous Measurement and Distribution Analysis of Urinary Nicotine, Cotinine, Trans-3′-Hydroxycotinine, Nornicotine, Anabasine, and Total Nicotine Equivalents in a Large Korean Population
Source: MDPI journal article supplement (doi:10.3390/molecules28237685), 2023-11-21
Supplement: s1 [file s1]

**Table S1.** Comparison of the correlations between various biomarkers related with smoking exposure

| Urinary biomarkers | Cotinine       | Nicotine | Nornicotine | 3-OH cotinine | Anabasine | TNE3     |
|--------------------|----------------|----------|-------------|---------------|-----------|----------|
| Cotinine           | r              | 0.9106   | 0.8994      | 0.9376        | 0.6674    | 0.9630   |
|                    | <i>P</i> value | < 0.0001 | < 0.0001    | < 0.0001      | < 0.0001  | < 0.0001 |
| Nicotine           | 0.9106         |          | 0.9145      | 0.9022        | 0.6835    | 0.9416   |
|                    | < 0.0001       |          | < 0.0001    | < 0.0001      | < 0.0001  | < 0.0001 |
| Nornicotine        | 0.8994         | 0.9145   |             | 0.9245        | 0.7319    | 0.8711   |
|                    | < 0.0001       | < 0.0001 |             | < 0.0001      | < 0.0001  | < 0.0001 |
| 3-OH cotinine      | 0.9376         | 0.9022   | 0.9245      |               | 0.6798    | 0.9282   |
|                    | < 0.0001       | < 0.0001 | < 0.0001    |               | < 0.0001  | < 0.0001 |
| Anabasine          | 0.6674         | 0.6835   | 0.7319      | 0.6798        |           | 0.6514   |
|                    | < 0.0001       | < 0.0001 | < 0.0001    | < 0.0001      |           | < 0.0001 |
| TNE3               | 0.9630         | 0.9416   | 0.8711      | 0.9282        | 0.6514    |          |
|                    | < 0.0001       | < 0.0001 | < 0.0001    | < 0.0001      | < 0.0001  |          |

3-OH cotinine, trans-3'-hydroxycotinine; TNE3, total nicotine equivalents three (the molar sum of nicotine, cotinine, and 3-OH cotinine).

**Table S2.** Agreement of the classification of smoking status based on the biomarkers between single uri-nary cotinine and multiple nicotine metabolites

| Biomarkers                | Positive                | Difference        | Cohen's kappa          |
|---------------------------|-------------------------|-------------------|------------------------|
| Cotinine alone            | 18.5%<br>(3,682/19,894) |                   |                        |
| Cotinine or Nicotine      | 18.6%<br>(3,705/19,894) | 0.1%<br>23/19,894 | 0.992<br>(0.990-0.995) |
| Cotinine or Nornicotine   | 18.6%<br>(3,699/19,894) | 0.1%<br>17/19,894 | 0.994<br>(0.992-0.996) |
| Cotinine or 3-OH cotinine | 18.8%<br>(3,737/19,894) | 0.3%<br>55/19,894 | 0.982<br>(0.979-0.985) |

3-OH cotinine, trans-3'-hydroxycotinine

20ng/mL for nicotine and cotinine, 50ng.mL for 3-OH cotinine, and 2 ng/mL for nornicotine as the cut-off values of four biomarkers for distinguishing between current smokers and non-smokers.

**Table S3.** Discrepancies between anabasine and nicotine metabolites without detectable

| Cases    | Number | Not detected (n, %) |               |               |               |
|----------|--------|---------------------|---------------|---------------|---------------|
|          |        | Cotinine            | Nicotine      | Nornicotine   | 3-OH cotinine |
| Detected | 4,286  | 1,205 (28.1%)       | 1,208 (28.2%) | 1,329 (31.0%) | 1,273 (29.7%) |
| Positive | 3,566  | 856 (24.0%)         | 848 (23.8%)   | 927 (26.0%)   | 897 (25.2%)   |

3-OH cotinine, trans-3'-hydroxycotinine

20ng/mL for nicotine and cotinine, 50ng.mL for 3-OH cotinine, and 2 ng/mL for nornicotine and anabasine as the cut-off values of five biomarkers for distinguishing between current smokers and non-smokers.

**Table S4. Analytical performances validation for five urinary biomarkers related with smoking exposure**

| Urinary biomarker | Precision (% CV)       |                          | Accuracy (% bias) |             | LLMI (ng/mL) | Linearity range (ng/mL) | $R^2$ | Recovery (%) | Matrix effect (%RSD) |
|-------------------|------------------------|--------------------------|-------------------|-------------|--------------|-------------------------|-------|--------------|----------------------|
|                   | Within-run ( $n = 5$ ) | Between-run ( $n = 30$ ) | Within-run        | Between-run |              |                         |       |              |                      |
| Cotinine          | 2.9-6.5                | 1.8-9.8                  | -5.6-0.8          | -6.0-1.9    | 1            | 1-5,000                 | 0.998 | 92.4-105.0   | 7.4-8.2              |
| Nicotine          | 3.9-7.7                | 1.5-9.3                  | -5.8--1.6         | -7.6-1.5    | 1            | 1-10,000                | 0.999 | 90.3-102.9   | 5.4-6.9              |
| Nornicotine       | 3.6-6.7                | 3.2-8.7                  | -6.3-0.3          | -4.0-4.7    | 1            | 1-10,000                | 0.998 | 93.5-106.0   | 5.4-5.4              |
| 3-OH cotinine     | 3.3-5.2                | 4.7-9.8                  | -0.4-3.0          | -8.5-3.1    | 5            | 5-15,000                | 0.999 | 94.2-109.0   | 4.2-7.6              |
| Anabasine         | 2.9-9.4                | 2.4-8.6                  | -10.1-5.3         | -5.0-2.8    | 1            | 1-10,000                | 0.999 | 86.8-103.4   | 4.3-10.1             |

3-OH cotinine, trans-3'-hydroxycotinine; LLMI, lower limit of measuring interval; RSD, Relative standard deviation

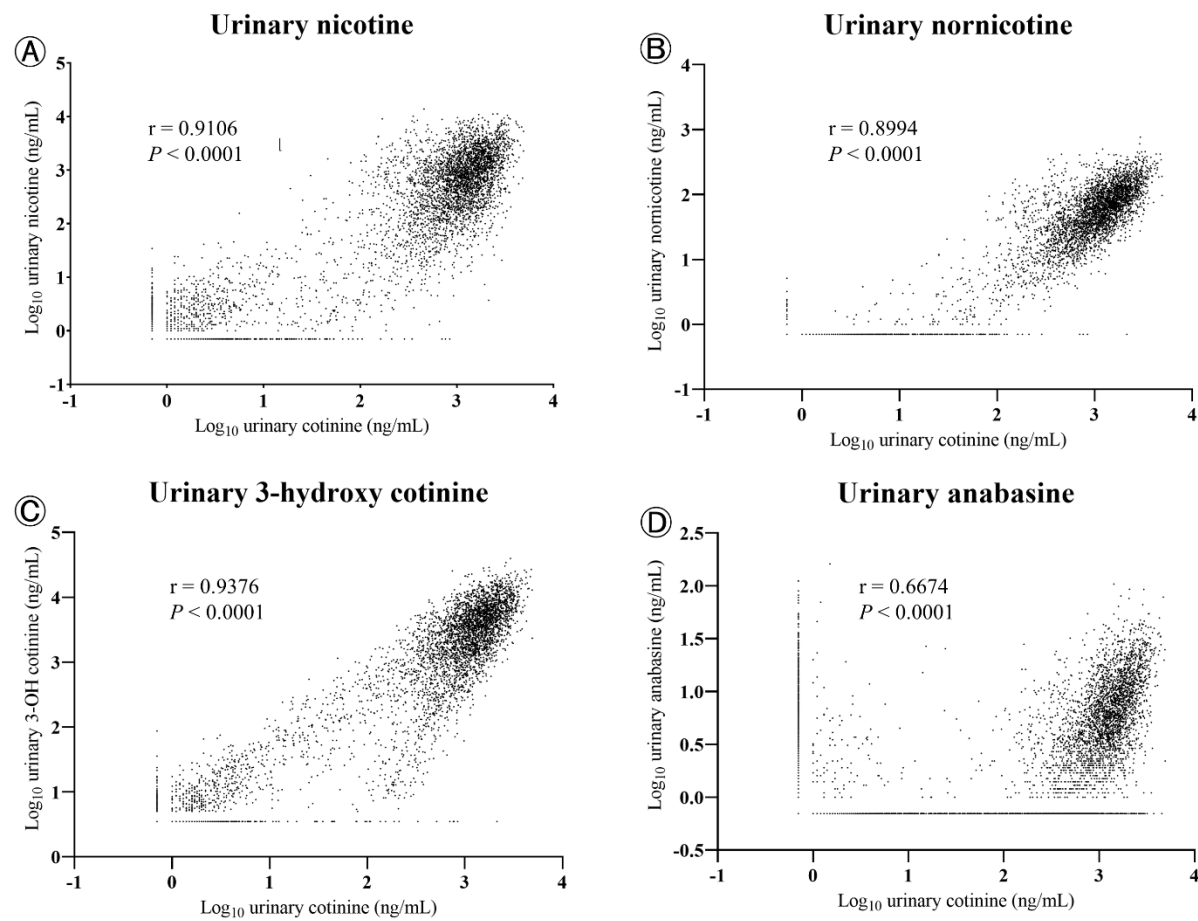

**Figure S1.**

The scatter plots of log-transformed urinary cotinine and various biomarkers related with smoking exposure

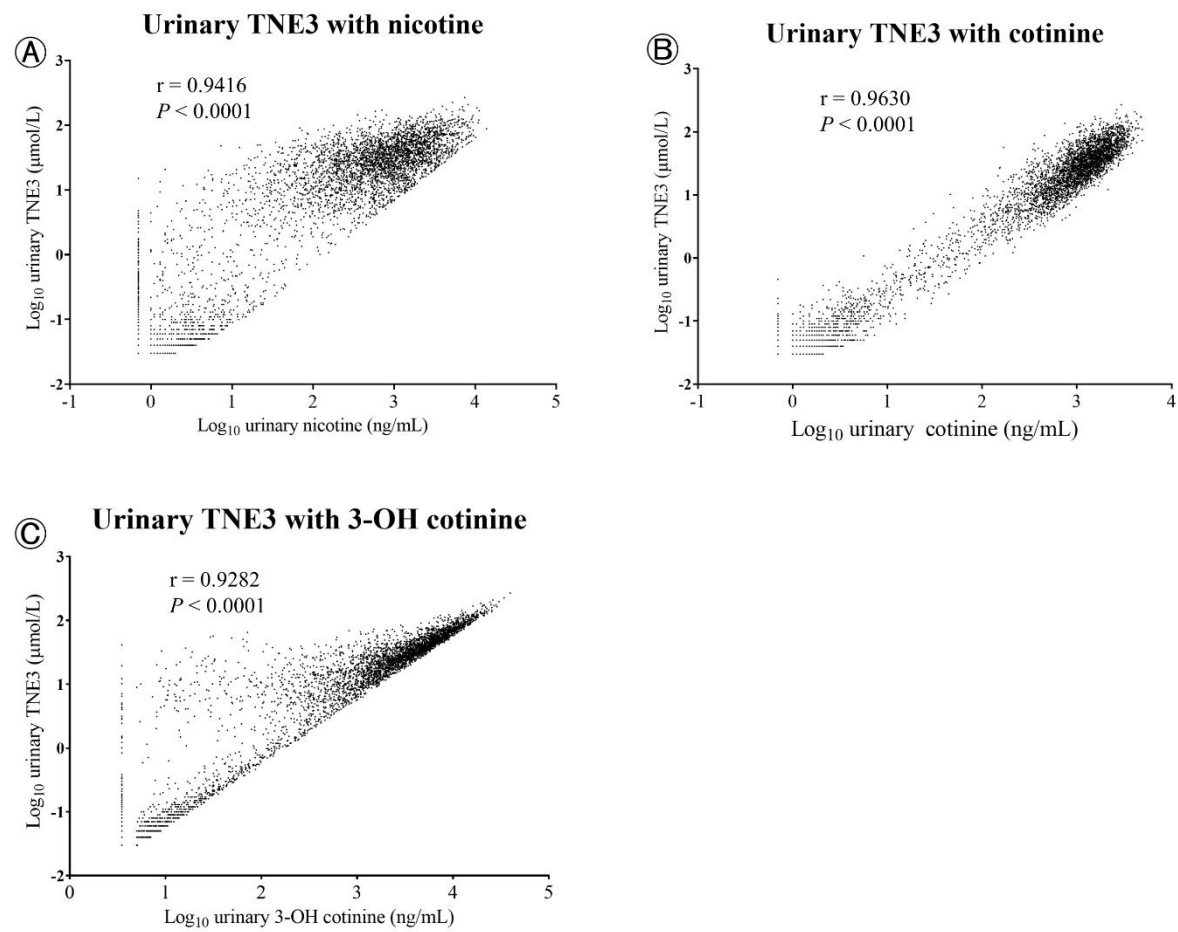

**Figure S2.**

The scatter plots of log-transformed urinary TNE3 and nicotine metabolites

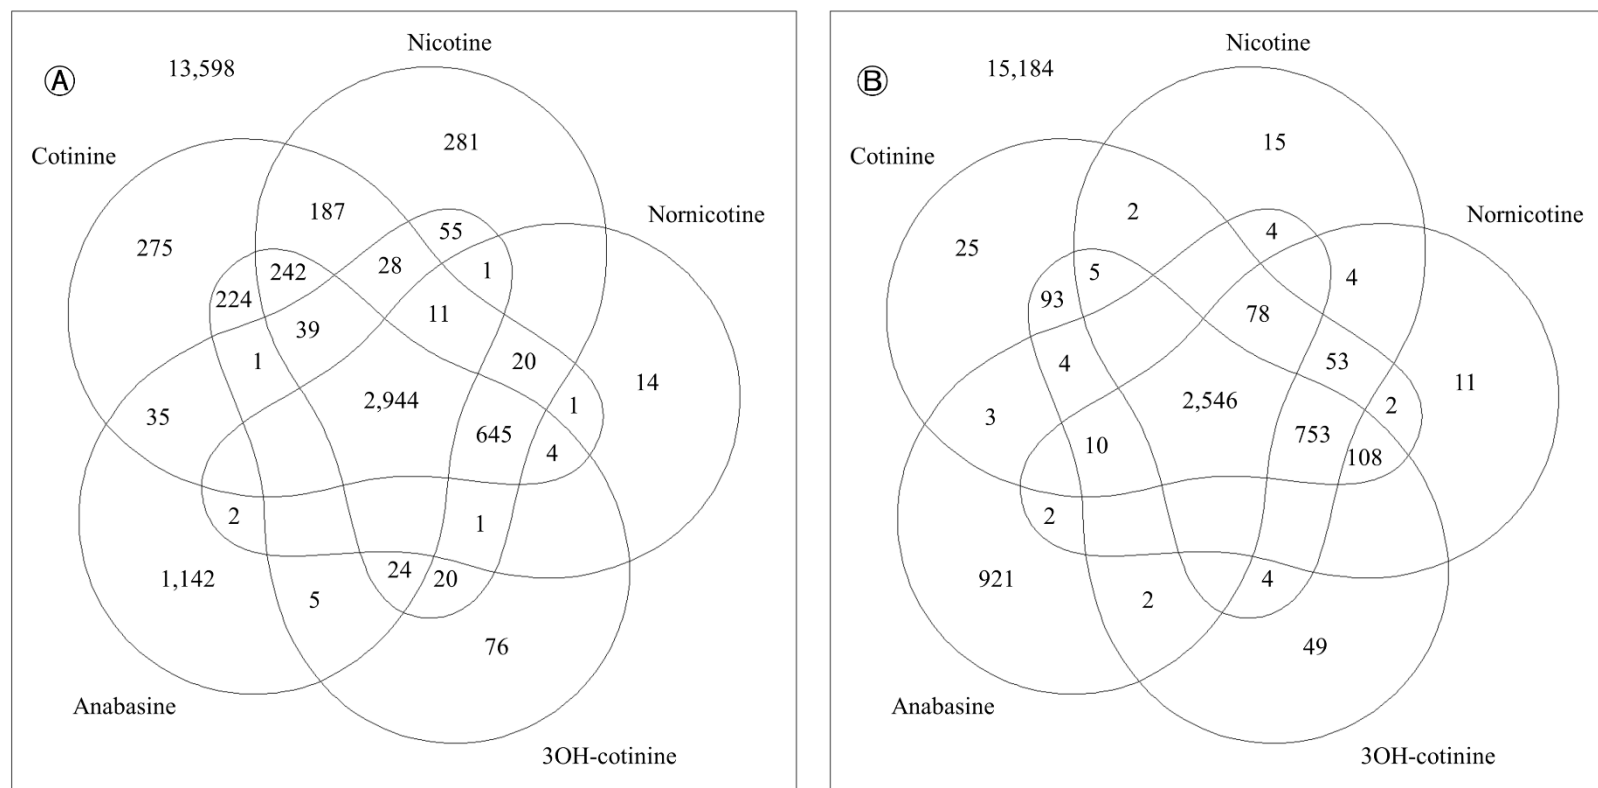

**Figure S3.**

Venn diagrams of five biomarkers for detection status (A) and classification of smoking status (B)

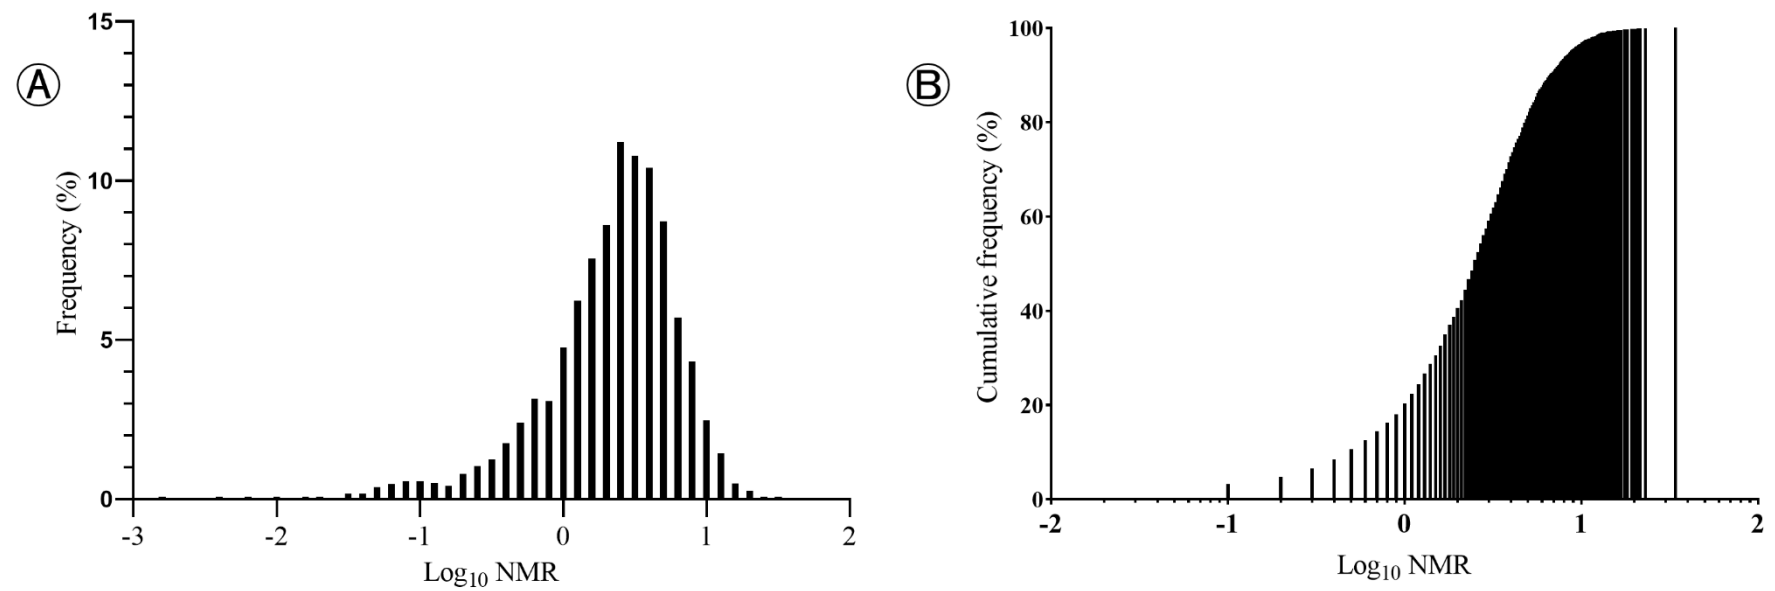

**Figure S4.**

Distribution of the ratio of urinary 3-OH cotinine to cotinine (NMR)

Frequency of log-transformed NMR (A) and its cumulative frequency (B)
